# Supplementary material for: Impact of BMI on Survival Outcomes of Immunotherapy in Solid Tumors: A Systematic Review
Source: PubMed Central journal article supplement (PMC7961496; doi:10.3390/ijms22052628), 2021-03-05
Supplement: ijms-22-02628-s001.pdf [file ijms-22-02628-s001.pdf]

**Supplementary Table S1.** Records identified with the literature search through databases.

| Database | Search strategy                                                                                                                                                                                                                                                                           | Records Identified |
|----------|-------------------------------------------------------------------------------------------------------------------------------------------------------------------------------------------------------------------------------------------------------------------------------------------|--------------------|
|          | MeSH terms/Search terms                                                                                                                                                                                                                                                                   |                    |
| PubMed   | Body mass index<br>Obesity<br>Immunotherapy<br>Ipilimumab<br>Nivolumab<br>Pembrolizumab<br>Atezolizumab<br>Durvalumab<br>Avelumab<br>Melanoma<br>Carcinoma, non small-cell lung<br>Carcinoma, renal cell<br>Urologic neoplasms<br>Neoplasms                                               | 450                |
| Scopus   | Body mass index<br>Obesity<br>Immunotherapy<br>anti-CTLA4<br>anti-PD1<br>anti-PD-L1<br>Ipilimumab<br>Nivolumab<br>Pembrolizumab<br>Atezolizumab<br>Durvalumab<br>Avelumab<br>Melanoma<br>Carcinoma, non small-cell lung<br>Urothelial tumor<br>Carcinoma, renal cell<br>Cancer<br>Outcome | 303                |

|                         |                                                                                                                                                                                                                                                                                                                                    |            |
|-------------------------|------------------------------------------------------------------------------------------------------------------------------------------------------------------------------------------------------------------------------------------------------------------------------------------------------------------------------------|------------|
| <p>Web of Science</p>   | <p>Body mass index<br/> Obesity<br/> Immunotherapy<br/> anti-CTLA4<br/> anti-PD1<br/> anti-PD-L1<br/> Ipilimumab<br/> Nivolumab<br/> Pembrolizumab<br/> Atezolizumab<br/> Durvalumab<br/> Avelumab<br/> Melanoma<br/> Carcinoma, non small-cell lung<br/> Urothelial tumor<br/> Carcinoma, renal cell<br/> Cancer<br/> Outcome</p> | <p>150</p> |
| <p>Embase</p>           | <p>Body mass index<br/> Obesity<br/> Immunotherapy<br/> Ipilimumab<br/> Nivolumab<br/> Pembrolizumab<br/> Atezolizumab<br/> Durvalumab<br/> Avelumab<br/> Melanoma<br/> Carcinoma, non small-cell lung<br/> Carcinoma, renal cell<br/> Urologic neoplasms<br/> Neoplasms</p>                                                       | <p>252</p> |
| <p>Cochrane Central</p> | <p>Body mass index<br/> Obesity<br/> Immunotherapy<br/> Ipilimumab<br/> Nivolumab<br/> Pembrolizumab<br/> Atezolizumab</p>                                                                                                                                                                                                         | <p>270</p> |

|  |                                                                                                                                  |  |
|--|----------------------------------------------------------------------------------------------------------------------------------|--|
|  | Durvalumab<br>Avelumab<br>Melanoma<br>Carcinoma, non small-cell lung<br>Carcinoma, renal cell<br>Urologic neoplasms<br>Neoplasms |  |
|--|----------------------------------------------------------------------------------------------------------------------------------|--|
